# Supplementary material for: What Is the Impact of Early and Subsequent Epidemic Characteristics on the Pre-delta COVID-19 Epidemic Size in the United States?
Source: MDPI journal article supplement (doi:10.3390/pathogens11050576), 2022-05-13
Supplement: s1 [file s1]

## **Supplementary Appendix:**

This is a supplementary material containing the results of spatiotemporal analysis and Spearman correlation test mentioned in the main text.

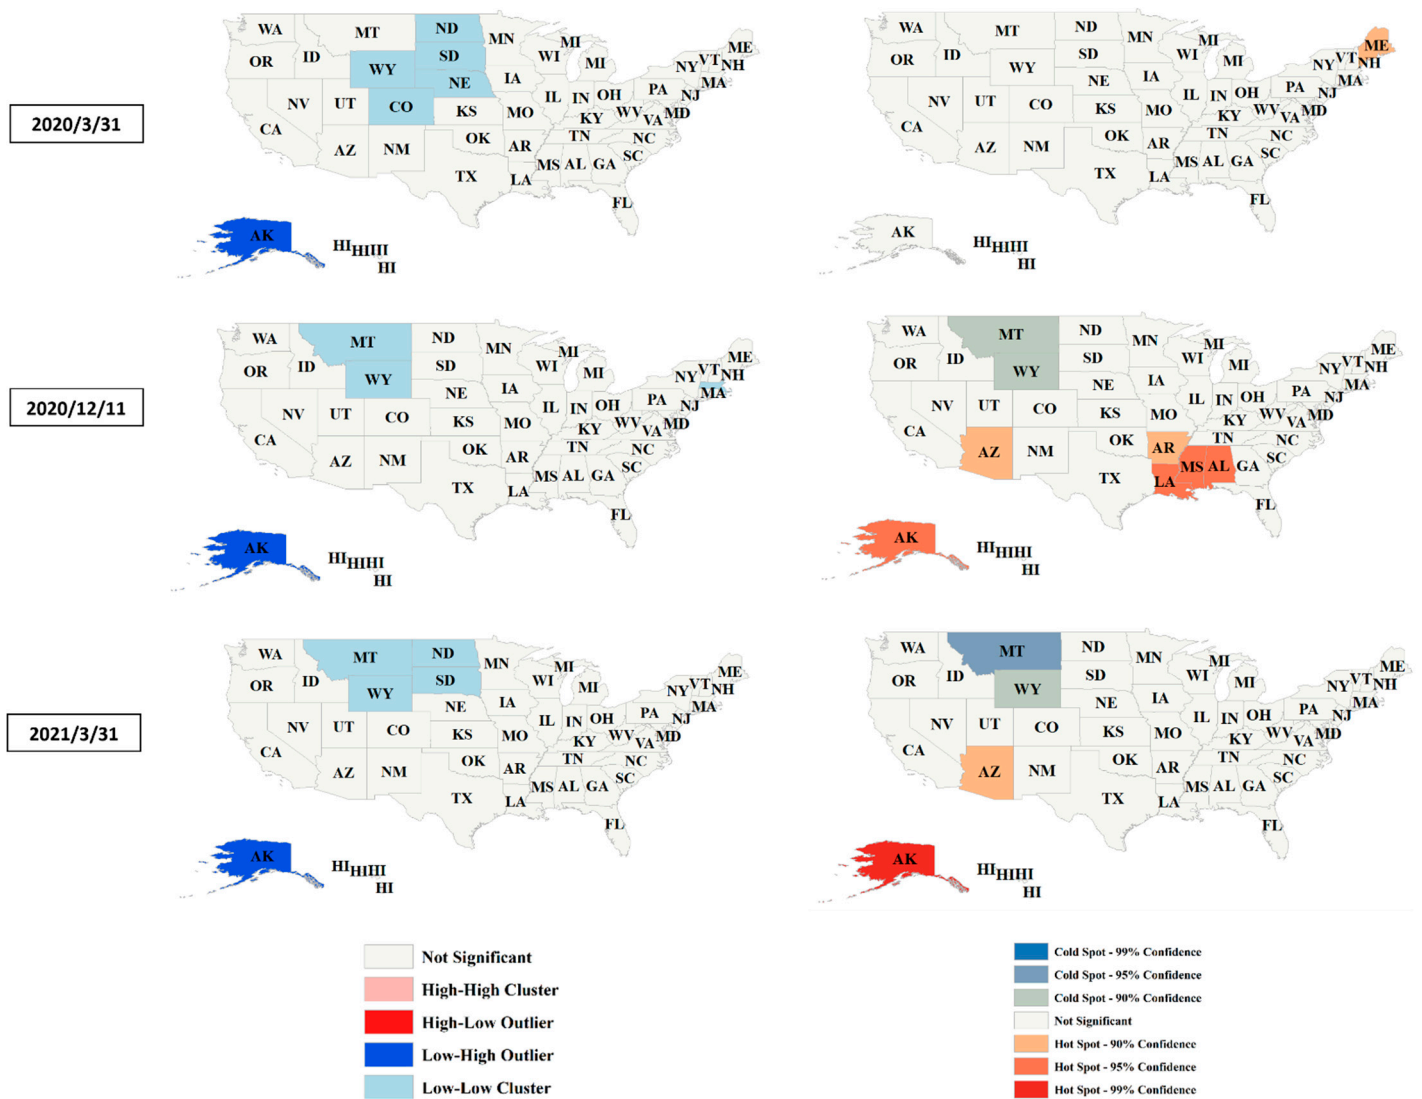

**Figure S1. The changes of geographic distribution of COVID-19 incidence in the United States from 31<sup>st</sup> March 2020 to 31<sup>st</sup> March 2021, including 11<sup>st</sup> December 2020.**

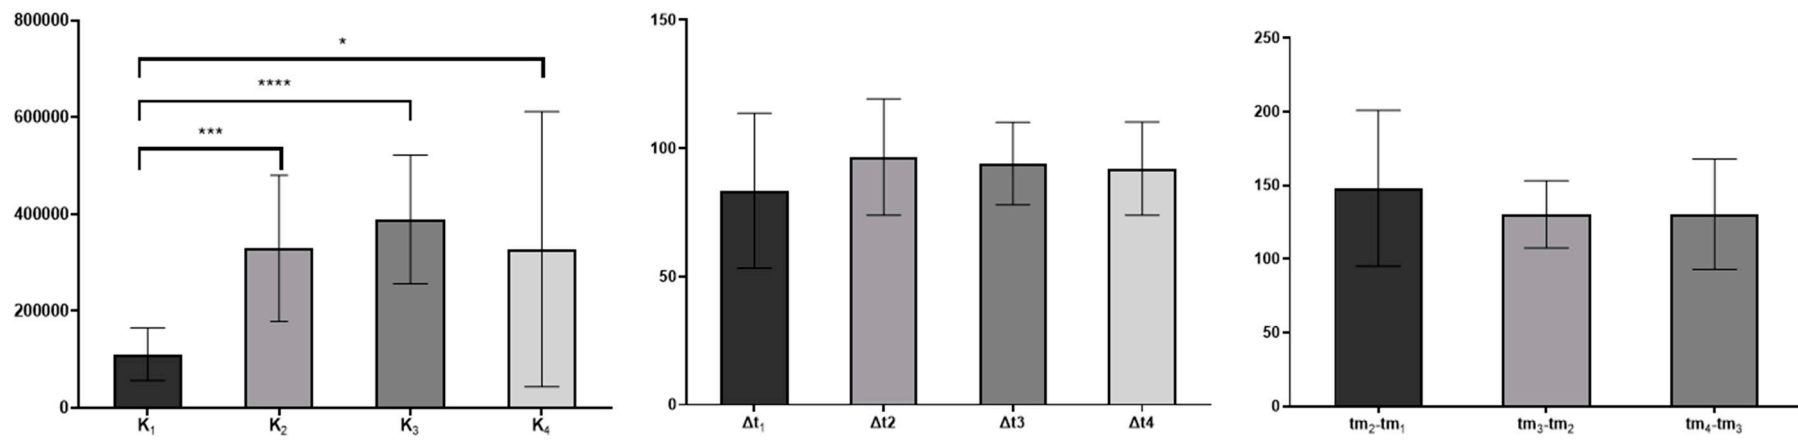

**Figure S2. Comparison of the fitted parameters for the multi-logistic approximation of 50 U.S. states and Washington DC. (\* represent  $p < 0.05$ , \*\* represent  $p < 0.01$ , \*\*\* represent  $p < 0.001$ , \*\*\*\* represent  $p < 0.0001$ ).**

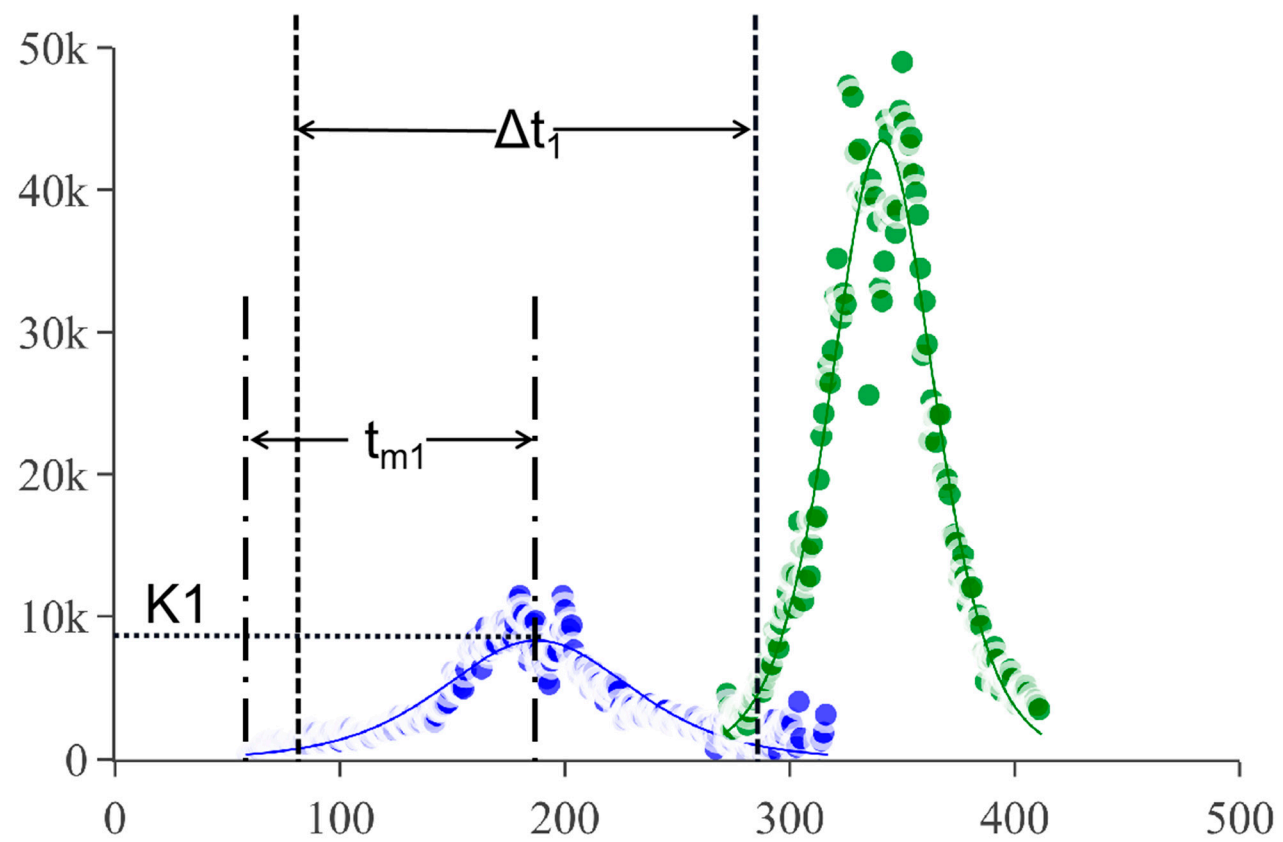

Figure S3. A schematic graph with three main indicators of  $K_m$ ,  $t_m$  and  $\Delta t$ .

**Table S1 The Global Moran's I of COVID-19 incidence in the United States on 31<sup>st</sup> March 2020, 31<sup>st</sup> March 2021 and 11<sup>th</sup> December 2020.**

| <b>Year</b> | <b>Moran's Index</b> | <b>Expected Index</b> | <b>Variance</b> | <b>z-score</b> | <b><i>p</i>-value</b> |
|-------------|----------------------|-----------------------|-----------------|----------------|-----------------------|
| 2020/3/31   | -0.005593            | -0.020000             | 0.000697        | 0.545635       | 0.585317              |
| 2020/12/11  | 0.010610             | -0.020000             | 0.002181        | 0.655389       | 0.512217              |
| 2021/3/31   | -0.012263            | -0.020000             | 0.002070        | 0.170045       | 0.864975              |

**Table S2. Spearman correlation between multi-logistic parameters and indicators in the early-stage of the epidemic and non-pharmacological intervention indicators. (\* represent  $p<0.05$ , \*\* represent  $p<0.01$ ).**

|                   | Epidemic size  | Non-pharmacological intervention indicators |                        |                 | Indicators in the early-stage of the epidemic |                                  |                                |                                |                     |                                                     |
|-------------------|----------------|---------------------------------------------|------------------------|-----------------|-----------------------------------------------|----------------------------------|--------------------------------|--------------------------------|---------------------|-----------------------------------------------------|
|                   |                | New cases on restriction                    | New cases on reopening | HAQ             | Day of the phase turning point                | Number of cases at turning point | Slow growing phase (cases/day) | Fast growing phase (cases/day) | Time from 30-to-100 | Case fatality rate in the first 100 confirmed cases |
| Phase             | 0.047          | 0.027                                       | 0.138                  | -0.020          | -0.172                                        | 0.261                            | 0.244                          | 0.171                          | 0.088               | 0.008                                               |
| K1                | <b>0.794**</b> | <b>0.694**</b>                              | <b>0.618**</b>         | -0.148          | -0.009                                        | -0.082                           | -0.014                         | <b>0.305*</b>                  | <b>-0.406**</b>     | -0.173                                              |
| K2                | <b>0.595**</b> | <b>0.505**</b>                              | <b>0.478**</b>         | -0.182          | 0.148                                         | -0.173                           | -0.163                         | 0.174                          | <b>-0.311*</b>      | -0.174                                              |
| K3                | <b>0.977**</b> | <b>0.506*</b>                               | <b>0.874**</b>         | -0.162          | 0.175                                         | 0.092                            | 0.035                          | 0.421                          | <b>-0.447*</b>      | -0.100                                              |
| K4                | <b>0.905**</b> | 0.714                                       | <b>0.829*</b>          | -0.286          | -0.277                                        | 0.024                            | -0.190                         | 0.595                          | -0.491              | 0.146                                               |
| SUM_K             | 0.108          | 0.262                                       | 0.116                  | <b>-0.401**</b> | -0.094                                        | 0.118                            | 0.067                          | 0.029                          | -0.029              | -0.047                                              |
| $\Delta t_1$      | -0.048         | -0.074                                      | -0.233                 | <b>-0.325*</b>  | -0.003                                        | 0.040                            | 0.013                          | -0.248                         | 0.229               | -0.178                                              |
| $\Delta t_2$      | -0.200         | -0.097                                      | -0.275                 | 0.102           | 0.180                                         | 0.027                            | -0.014                         | -0.014                         | -0.035              | -0.041                                              |
| $\Delta t_3$      | -0.118         | -0.290                                      | -0.316                 | -0.148          | -0.007                                        | -0.201                           | 0.010                          | 0.066                          | -0.185              | 0.148                                               |
| $\Delta t_4$      | -0.048         | 0.179                                       | -0.086                 | <b>-0.929**</b> | 0.289                                         | 0.048                            | 0.000                          | 0.452                          | 0.245               | 0.512                                               |
| Sum of $\Delta t$ | 0.073          | 0.077                                       | 0.036                  | -0.221          | -0.261                                        | 0.118                            | 0.198                          | 0.027                          | 0.193               | 0.127                                               |
| tm1               | -0.012         | -0.026                                      | -0.174                 | -0.180          | <b>0.277*</b>                                 | -0.193                           | <b>-0.284*</b>                 | <b>-0.314*</b>                 | 0.177               | -0.215                                              |
| tm2               | 0.070          | 0.111                                       | -0.002                 | 0.214           | <b>0.383**</b>                                | -0.190                           | -0.244                         | -0.024                         | -0.095              | -0.079                                              |
| tm3               | -0.204         | -0.006                                      | -0.178                 | 0.130           | -0.113                                        | <b>-0.451*</b>                   | -0.281                         | -0.346                         | 0.331               | 0.036                                               |
| tm4               | -0.108         | 0.179                                       | -0.143                 | <b>-0.766*</b>  | 0.085                                         | -0.216                           | -0.216                         | 0.228                          | 0.220               | 0.393                                               |
